# Supplementary material
Source: publisher figshare collection journal article supplement (https://frontiersin.figshare.com/ndownloader/files/15460031)
Supplement: Supplementary file 1 [file 15460031]

## Sheet: Table1_Inputdata
Supplementary Table 1. Data sets used for the SDM. Macroalgae, hard substrate and bathymetry data were compiled from different sources and processed. *Field season for macroalgae (MA) sampling is defined as follows: data are all sampled in Potter Cove (Carlini station), one year indicates sampling months Jan-March; two years Dec- March.
Data set	Georeference quality	* Field season (MA)	Data type	Interpretation MA presence (P)/absence (A)	Weighted in EM	number of samples	Reference/Originator
Macroargae (MA)
MA, relative coverage	approximation	2008	videos	(P/A)	1	322	Quartino et al. 2013
MA, relative coverage	DGPS	2011-2012	videos	(P/A)	1	593	Woelfl (raw data, unpublished), analyzed by Quartino and Scharf
MA, relative coverage	approximation	2009	photographs	(P/A)	1	599	Sahade et al. 2015
MA presence, substrate	DGPS	2010-2012	hydroacoustic data (RoxAnn GDX)	(P/A)	0.75	5284	Hass, unpublished
MA	approximation	2015	personal sighting	(P)	1	59	Deregibus, personal comm. 2015
benthos	GPS	2014-2015	photographs	(A)	1	17	Sahade, personal comm. 2015
MA experiments	GPS	2014-2015	photographs	(P)	1	18	Deregibus, personal comm. 2015
benthos	GPS	2015	photographs	(A)	1	3	Hoffmann & Braeckmann, unpublished
sediment type, MA occurence	DGPS	2011-2012	videos	(P/A)	1	336	Woelfl et al. 2014
grainsize, bedrock	DGPS	2011-2012	VanVeen grab	(A)	1	113	Woelfl et al. 2014
MA presence (P) /absence (A) compilation	mixed	2008-2015	point data	(3672P/3672 A)	0.75 / 1	7344	this issue
Data set	Georeference quality	Sampling period	Data type	Interpretation MA: yes (Y) /no (N)		number of samples	Reference/Originator
hard substrate
MA presence locations from video and photographs	mixed	2008-2015	point data	(Y)		1177	this issue
grainsize, presumed hard substrate	DGPS	2011-2012	VanVeen grab	(Y/N)		129	Woelfl et al. 2014
MA presence, substrate	DGPS	2010-2012	hydroacoustic data (RoxAnn GDX)	(Y/N)		22915	Hass, unpublished
benthos	GPS	2014-2015	photographs	(N)		17	Sahade, personal comm. 2015
MA experiments	GPS	2014-2015	photographs	(y)		23	Deregibus, Campana, personal comm. 2015
sediment type, MA occurence	DGPS	2011-2012	videos	(Y/N)		336	Woelfl et al. 2014
hard substrate yes (Y) / no (N) compilation	mixed	2010-2015	raster (5 * 5 m), indicator kriging	(13710 Y/10887 N)		24597	this issue
Data set	Georeference quality	Sampling year	Data processing			Resolution	Reference/Originator
bathymetry
raster processed from multibeam data	DGPS	2012	extract raster point values from processed multibeam raster			5 * 5 m	UKHO 2012
single bleam data	GPS	2010	single beam point data, supplemental to the multibeam area			-	IAA 2010
satelite image	orthorectified	2013	coast line defining the zero contour			-	DigitalGlobe 2014
raster, processed compilation	good	2010-2013	'Topo to Raster' including 'contour type option' (ArcMap 10.3)			5 * 5 m	this issue
slope	GPS	2010-2013	directional East-West and North-South gradient (Jenness 2013) of bathymetry raster, processed compilation, this issue			5 * 5 m	this issue
distance to glacier	GPS	2013	Euclidean distance to the glacier front			5 * 5 m	this issue, DigitalGlobe, 2014
total organic carbon (TOC [%])	GPS	2010	raster interpolated from 57 sample sites, Empirical Bayesian Kriging			5 * 5 m	Monien et al. 2014 (47 points) and Monien, unpublished (10 points)
subspended particulate matter (SPM [relative values])	orthorectified	2013	raster, band 4 of WorldView-2 scene 103001001F612100			0.5* 0.5 m	DigitalGlobe 2014
